# Supplementary material for: Pharmacist-led Medication Counseling for Patients Undergoing Hemodialysis: A Path to Better Adherence
Source: PubMed Central journal article supplement (PMC7177809; doi:10.3390/ijerph17072399), 2020-04-01
Supplement: ijerph-17-02399-s001.pdf [file ijerph-17-02399-s001.pdf]

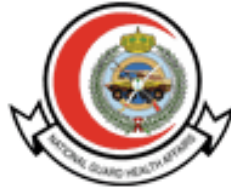

Kingdom Of Saudi Arabia  
National Guard Health Affairs

## Supplementary Material

**Table S1. Hemodialysis Patient Satisfaction Survey Regarding Medication Counseling. Lolwa Alabdelmuhsin. Pharmacist at KAMC - NGHA**

Dear participant I am a pharmacist Lolwa Alabdelmuhsin doing my master research, and conduct this survey to assess your satisfaction regarding pharmacy services about medication counseling. It is a face-to-face survey, which will take about ten to fifteen minutes to complete it. In case for further inquiries or questions, please contact me on this extension number 19887. Thank you.

**Patient serial number:** .....

### First part:

**1. Gender:**

- Male.
- Female.

**2. Age:**

- 18 to 30 years old.
- 31 to 50 years old.
- 51 to 75 years old.
- More than 75 years old.

**3. What language do you mainly speak:**

- Arabic.
- English.
- Both English and Arabic.
- Other \_\_\_\_\_

**4. What is the highest grade or level of school you have completed?**

- Primary school or less.
  - Intermediate school.
  - High school.
  - Bachelors.
  - Advanced degree.
- 5. Occupational status:**
- Employed.
  - Unemployed.
- 6. Material status:**
- Single.
  - Married.
  - Divorced.
  - Widowed.
- 7. Number of children:**
- None.
  - Five or less.
  - Ten or less.
  - More than ten.
- 8. Has any kind of co-morbidities: (You can choose more than one answer)**
- None.
  - Hypertension.
  - Diabetes mellitus.
  - Other, \_\_\_\_\_.
- 9. For how long have you been on dialysis:**
- 3 to 6 months.
  - More than 6 to 12 months
  - More than 1 to 5 years.
  - More than 5 years.

**Second part:**

**1. I usually claim my medications from:**

- Ambulatory Care pharmacy.

- Emergency Pharmacy.

**2. Who supposed to give you the proper information about your prescribed medication:**

- Physician.
- Pharmacist.
- Nurse.
- Do not know.

**3. The best time for pharmacist counseling during the day of hemodialysis session is:**

- Before dialysis session.
- During dialysis session.
- After dialysis session.
- Do not know.

**4. Who get your medication usually from the pharmacy:**

- You.
- Relatives.
- House maid or driver.
- Through the nurse.
- Other, \_\_\_\_\_.

**Third Part: (Rate the following items using a scale of one to ten with ten being Excellent and one being Poor)**

| Statement                                                                                          | Poor<br>(1) | (2) | (3) | (4) | (5) | (6) | (7) | (8) | (9) | Excellent<br>(10) |
|----------------------------------------------------------------------------------------------------|-------------|-----|-----|-----|-----|-----|-----|-----|-----|-------------------|
| The overall pharmacy services for dialysis-dependent patient regarding their prescribed medication | ○           | ○   | ○   | ○   | ○   | ○   | ○   | ○   | ○   | ○                 |
| The pharmacist counseling regarding your prescribed medication                                     | ○           | ○   | ○   | ○   | ○   | ○   | ○   | ○   | ○   | ○                 |

**Fourth part:**

| Statement                                                                                           | Usually               | Sometimes             | Never                 | N/A                   |
|-----------------------------------------------------------------------------------------------------|-----------------------|-----------------------|-----------------------|-----------------------|
| The pharmacist encourage me to ask any questions regarding my prescribed medication                 | <input type="radio"/> | <input type="radio"/> | <input type="radio"/> | <input type="radio"/> |
| The pharmacist who dispense your prescribed medication listen carefully to you                      | <input type="radio"/> | <input type="radio"/> | <input type="radio"/> | <input type="radio"/> |
| The pharmacist who dispense your prescribed medication explain things in a way you could understand | <input type="radio"/> | <input type="radio"/> | <input type="radio"/> | <input type="radio"/> |
| The pharmacist who dispense your prescribed medication give you enough time for counseling          | <input type="radio"/> | <input type="radio"/> | <input type="radio"/> | <input type="radio"/> |

**Fifth part:**

| Statement                                                                                        | Agree                 | Disagree              |
|--------------------------------------------------------------------------------------------------|-----------------------|-----------------------|
| I prefer to have booklet about my medication                                                     | <input type="radio"/> | <input type="radio"/> |
| I think providing hotline for medication counseling will improve my compliance to the medication | <input type="radio"/> | <input type="radio"/> |
| I know that hemodialysis will affect the efficiency of my medications                            | <input type="radio"/> | <input type="radio"/> |
| I am interested to know more about my medication                                                 | <input type="radio"/> | <input type="radio"/> |
